# Supplementary material for: Altered directional connectivity between emotion network and motor network in Parkinson's disease with depression
Source: PubMed Central journal article supplement — Medicine (Baltimore). 2016 Jul 29;95(30):e4222. doi: 10.1097/MD.0000000000004222 (PMC5265831; doi:10.1097/md.0000000000004222), 2016-07-29
Supplement: medi-95-e4222-s001.pdf [file medi-95-e4222-s001.pdf]

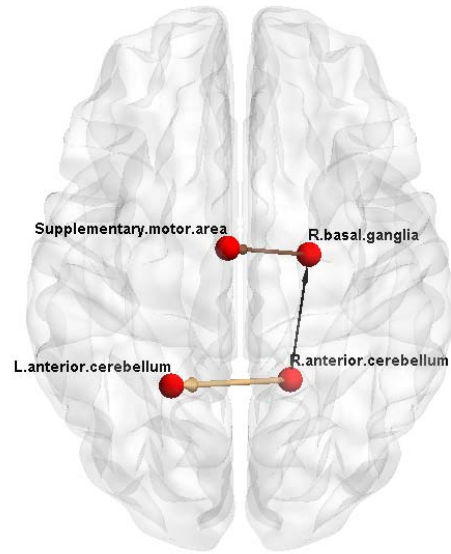

Figure 1 all path within MN when  $DPD > NC$

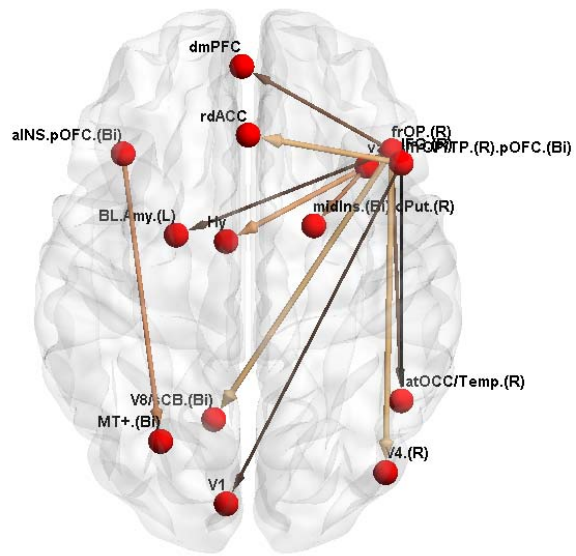

Figure 2 all path within EN when  $DPD > NC$

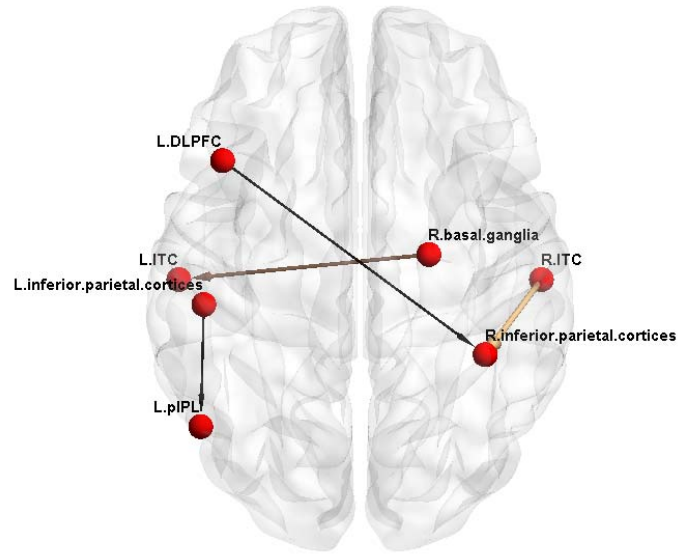

Figure 3 all path between MN&DMN when DPD>NC

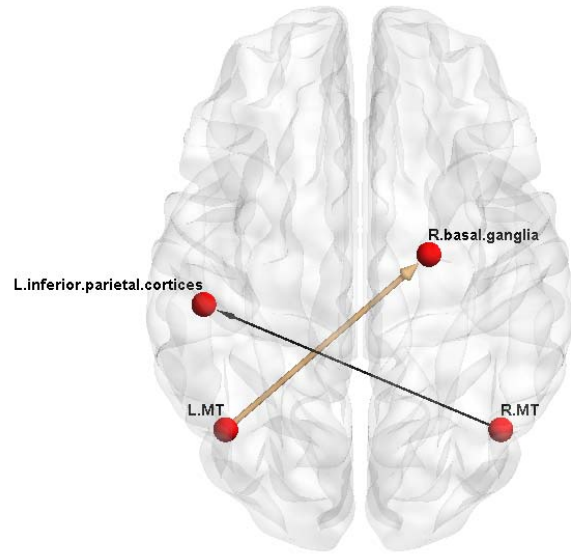

Figure 4 all path between MN&DAN when  $DPD > NC$

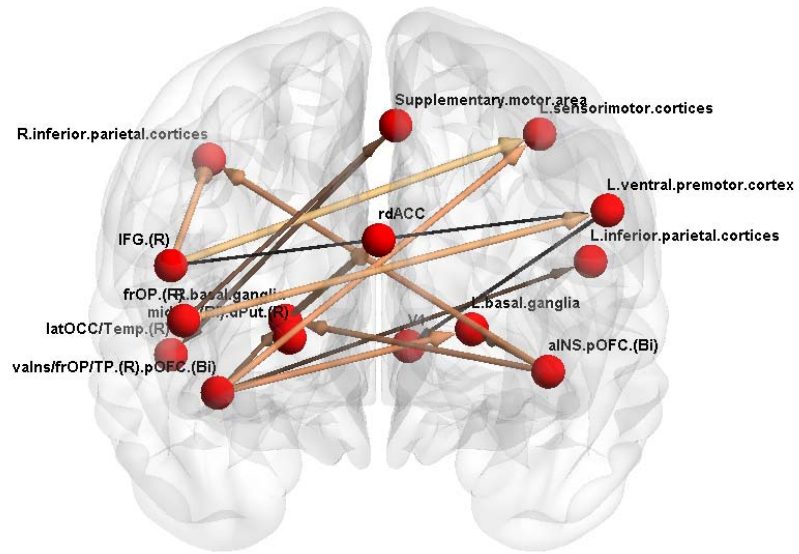

p

Figure 5 all path between MN&EN when DPD>NC

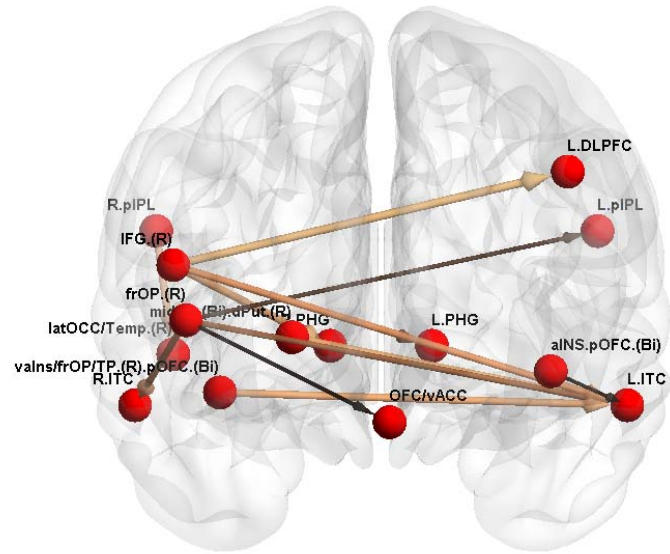

Figure 6 all path between EN&DMN when DPD>NC

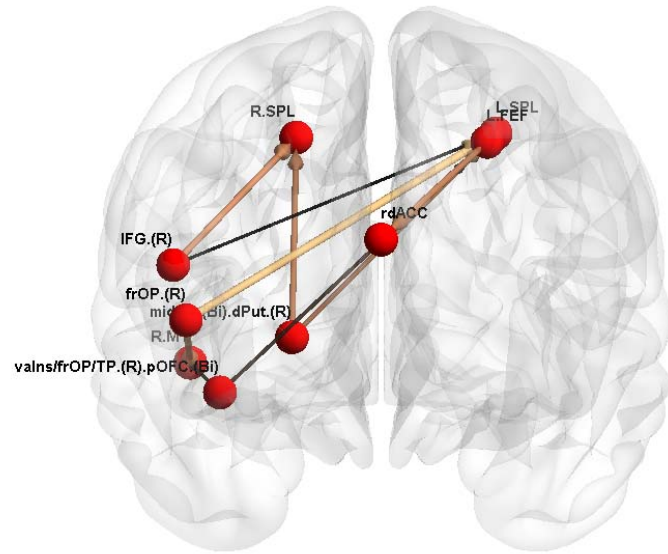

Figure 7 all path between EN&DAN when DPD>NC

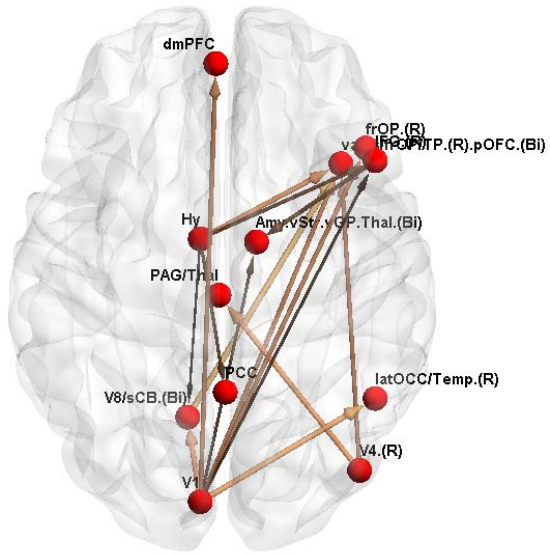

Figure 8 all path within EN when  $DPD < NC$



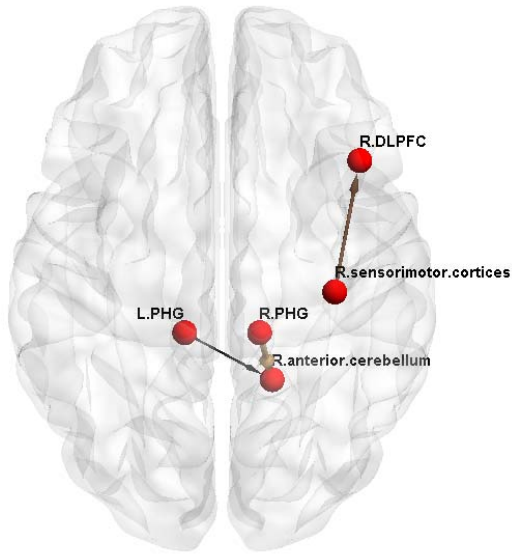

Figure 9 all path between MN&DMN when  $DPD < NC$

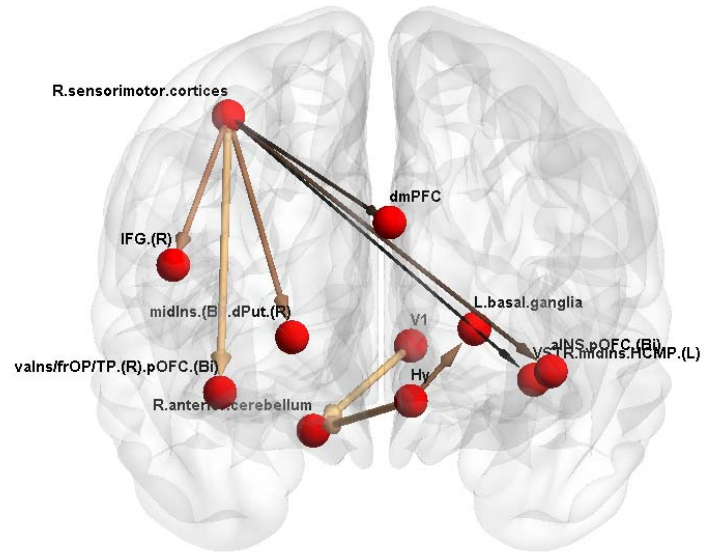

Figure 10 all path between MN&EN when  $DPD < NC$

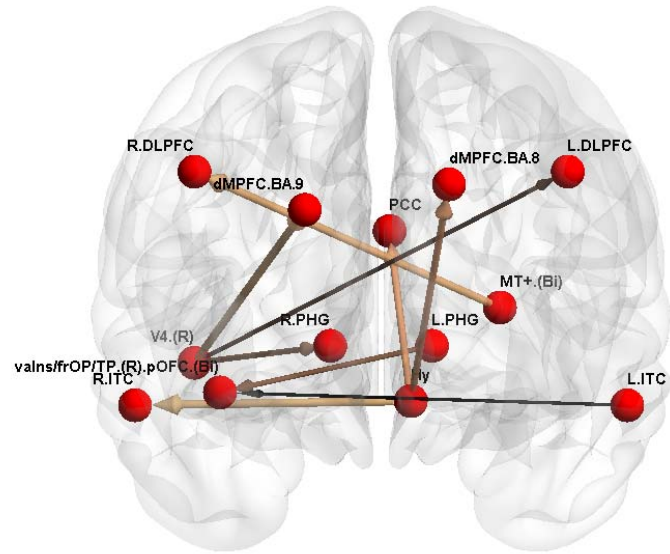

Figure 11 all path between EN&DMN when  $DPD < NC$

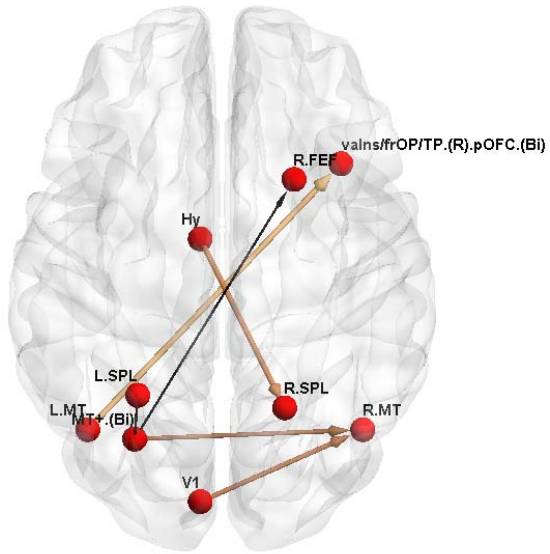

Figure 12 all path between EN&DAN when  $DPD < NC$

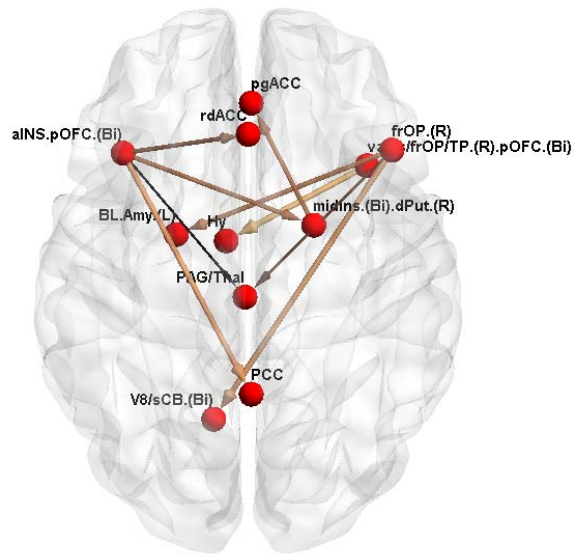

Figure 13 all path within EN when  $DPD > NDPD$

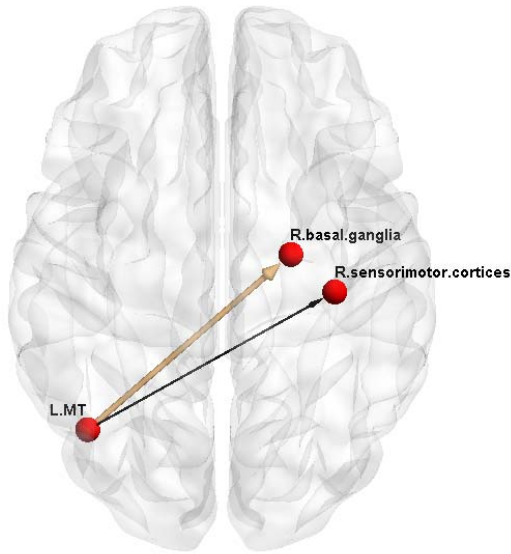

Figure 14 all path between MN&DAN when  $DPD > NDPD$

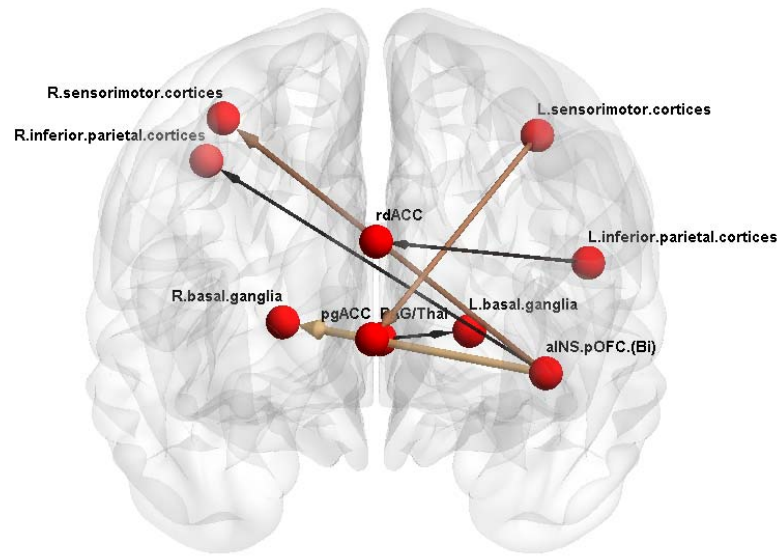

Figure 15 all path between MN&EN when  $DPD > NDPD$

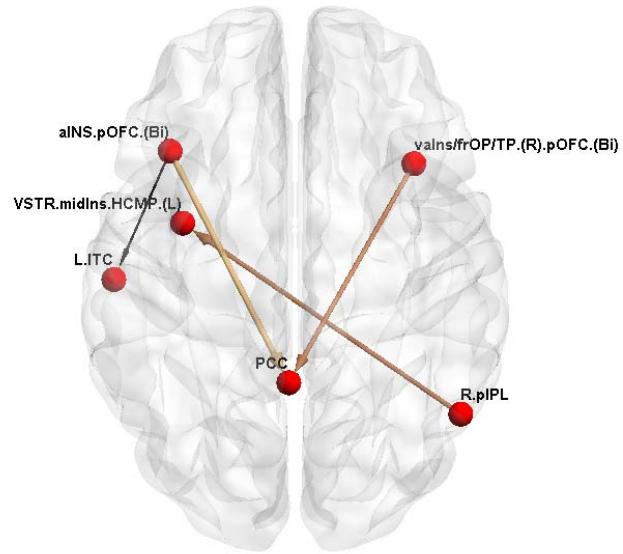

Figure 16 all path between EN&DMN when DPD > NDPD



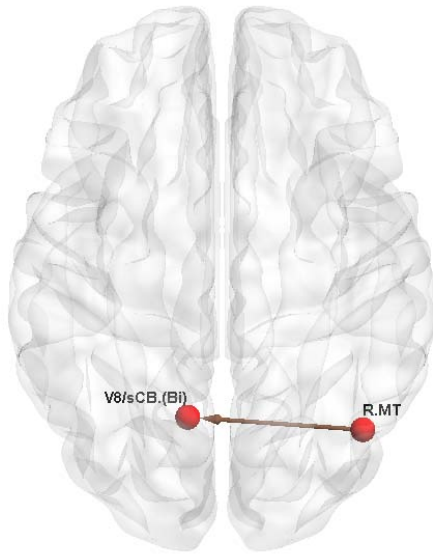

Figure 17 all path between EN&DAN when  $DPD > NDPD$

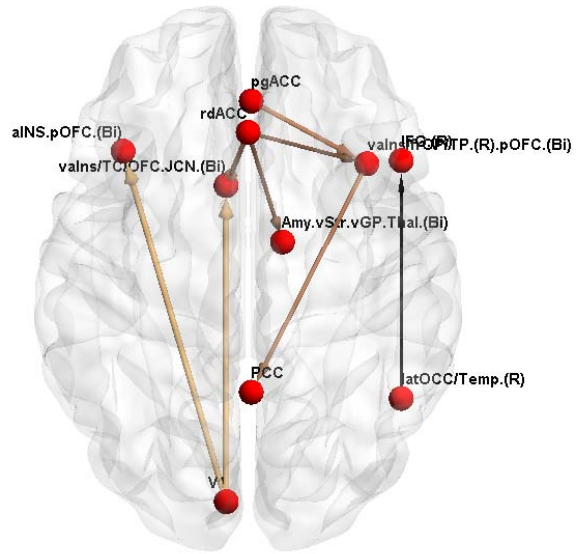

Figure 18 all path within EN when  $DPD < NDPD$

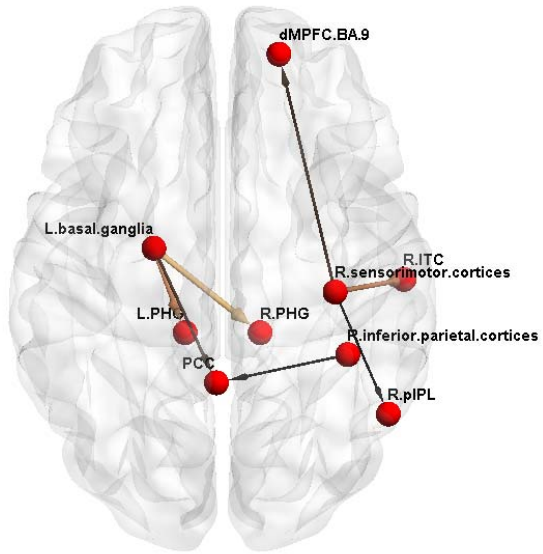

Figure 19 all path between MN&DMN when  $DPD < NDPD$

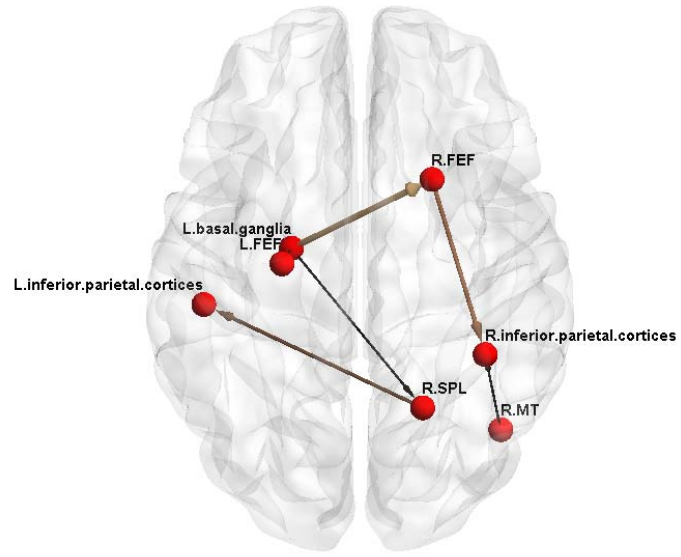

Figure 20 all path between MN&DAN when  $DPD < NDPD$

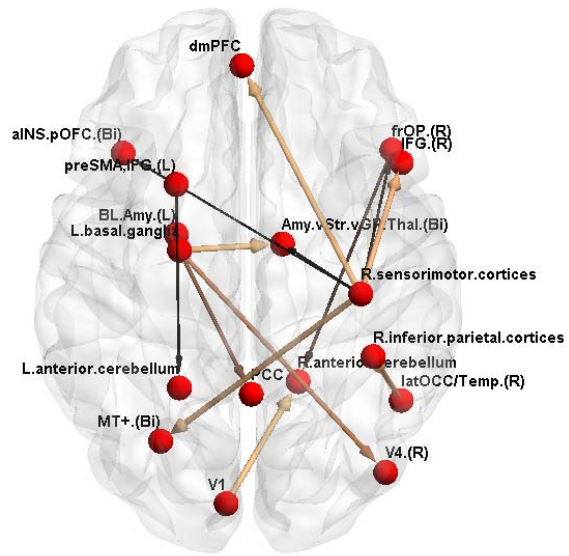

Figure 21 all path between MN&EN when  $DPD < NDPD$

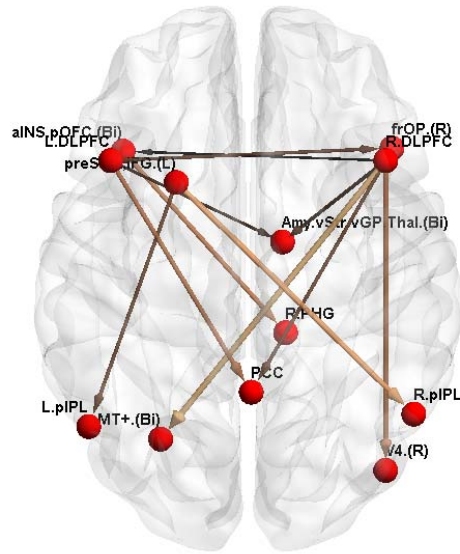

Figure 22 all path between EN&DMN when  $DPD < NDPD$

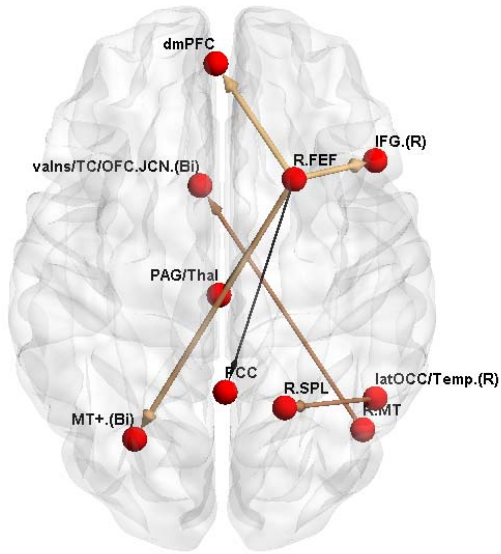

Figure 23 all path between EN&DAN when  $DPD < NDPD$

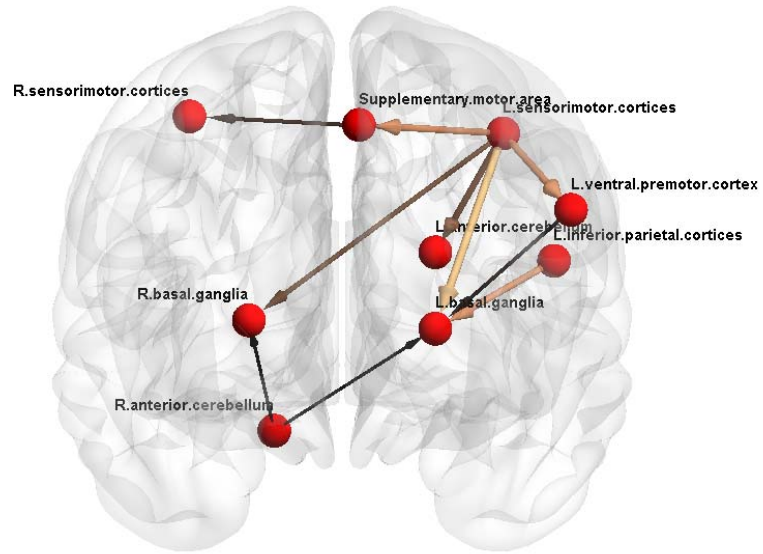

Figure 24 all path within MN when  $DPD > MDD$



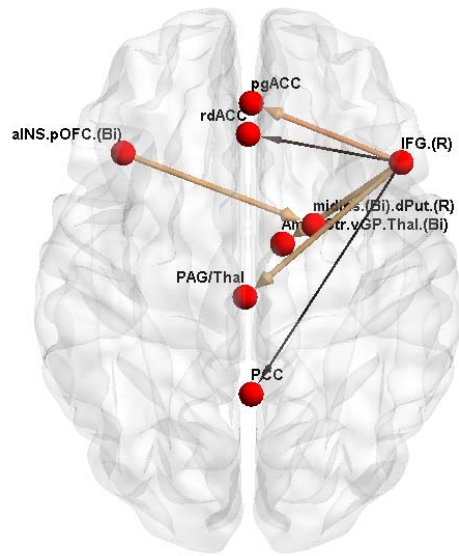

Figure 25 all path within EN when  $DPD > MDD$

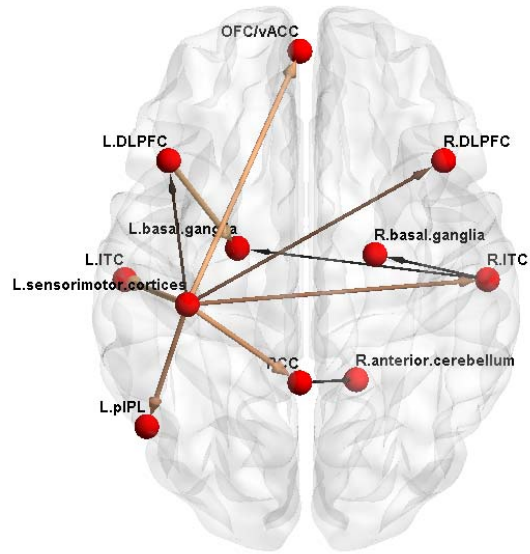

Figure 26 all path between MN&DMN when DPD>MDD

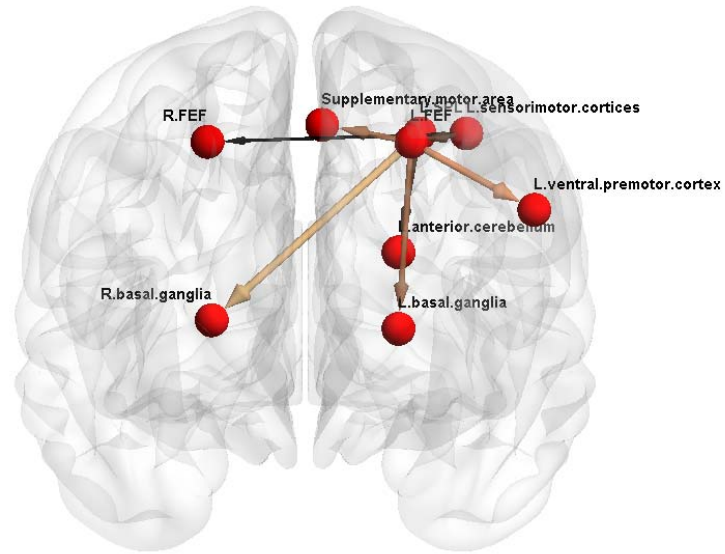

Figure 27 all path between MN&DAN when  $DPD > MDD$

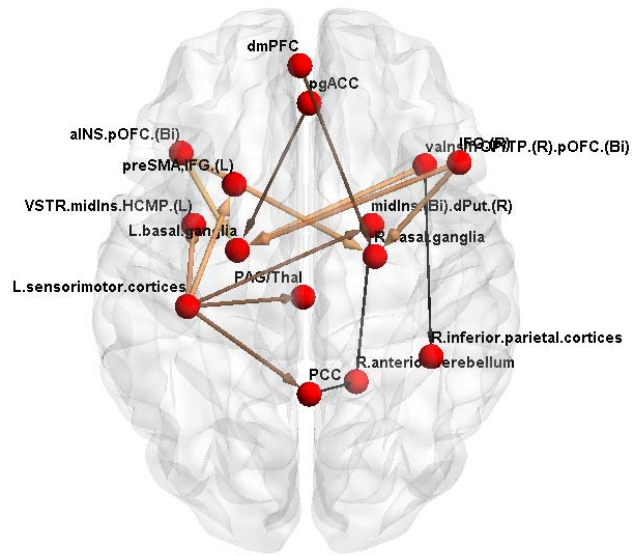

Figure 28 all path between MN&EN when DPD>MDD

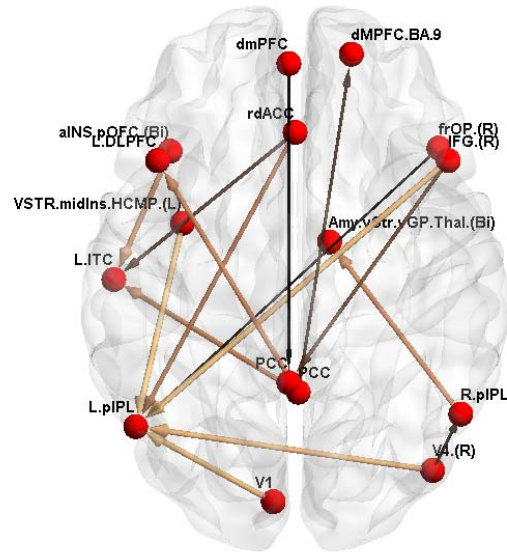

Figure 29 all path between EN&DMN when DPD>MDD

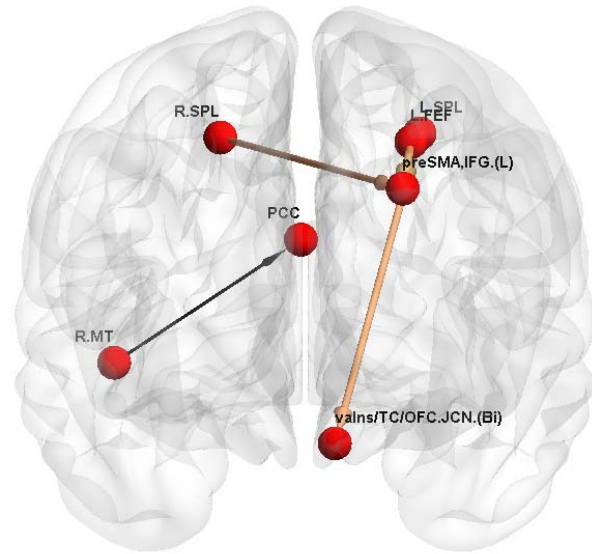

Figure 30 all path between EN&DAN when  $DPD > MDD$

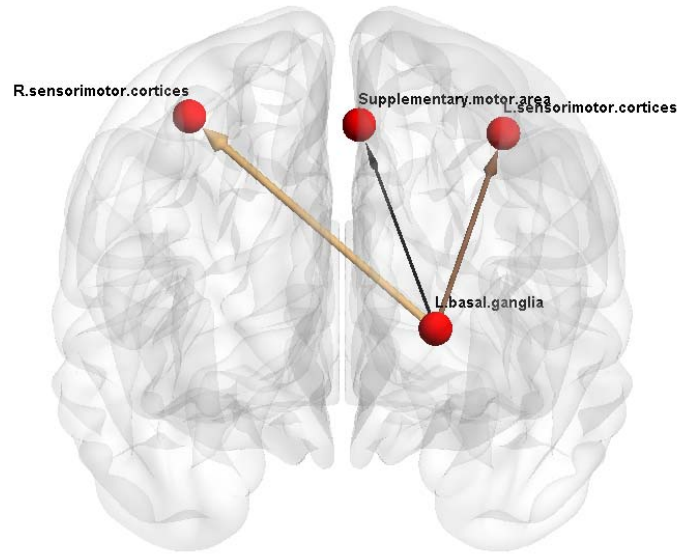

Figure 3 | all path within MN when  $DPD < MDD$

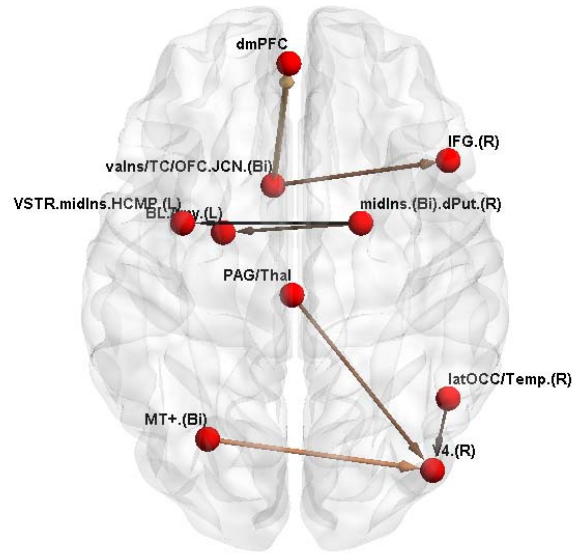

Figure 32 all path within EN when  $DPD < MDD$



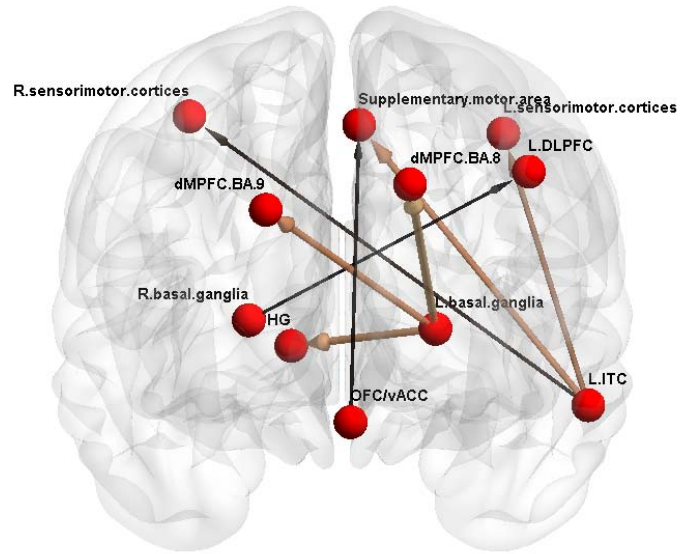

Figure 33 all path between MN&DMN when  $DPD < MDD$

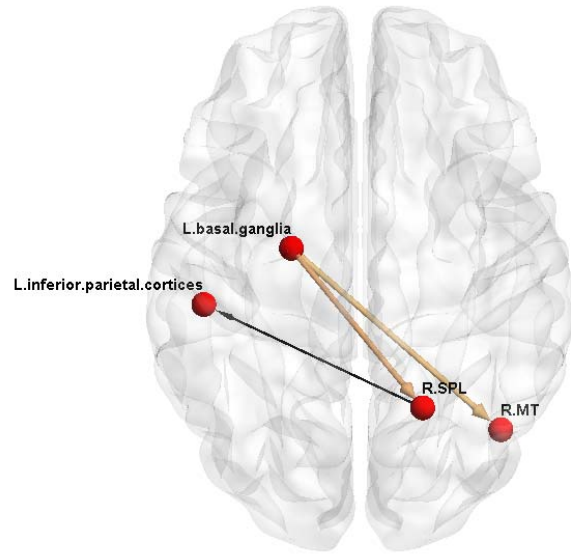

Figure 34 all path between MN&DAN when  $DPD < MDD$

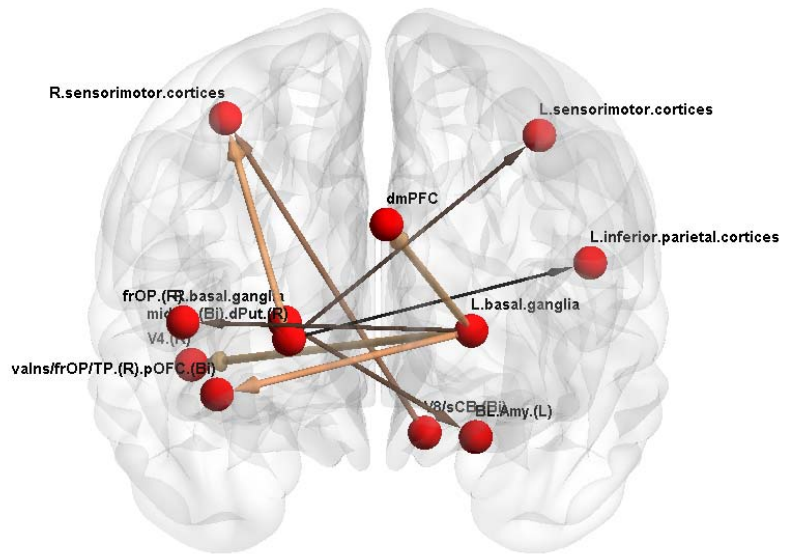

Figure 35 all path between MN&EN when  $DPD < MDD$

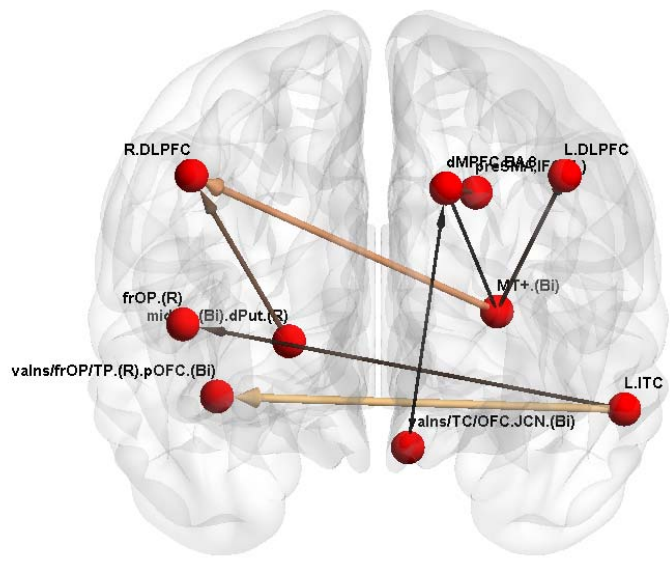

Figure 36 all path between EN&DMN when DPD<MDD

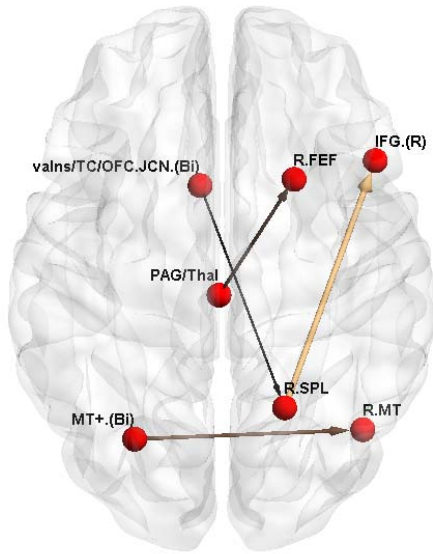

Figure 37 all path between EN&DAN when  $DPD < MDD$

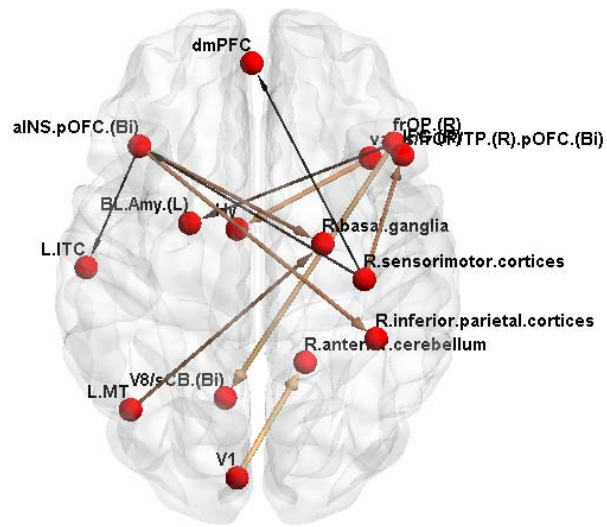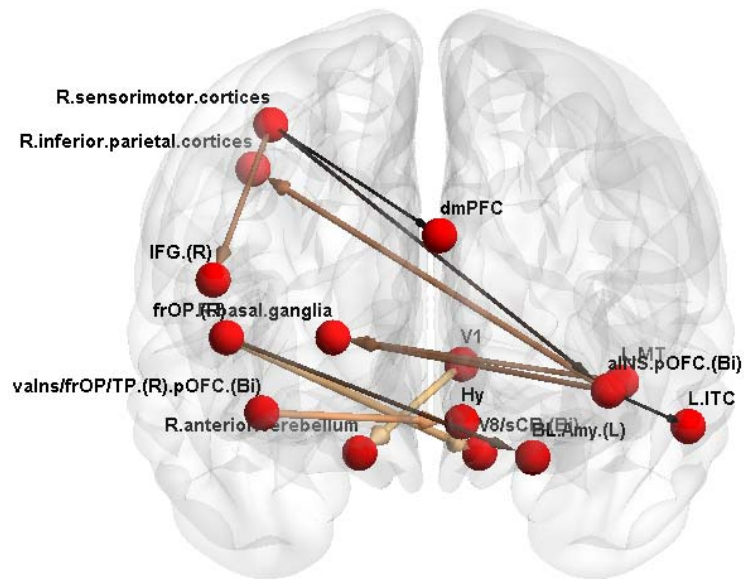

Figure 38 common path in comparisons of DPD&NC and DPD&NDPD

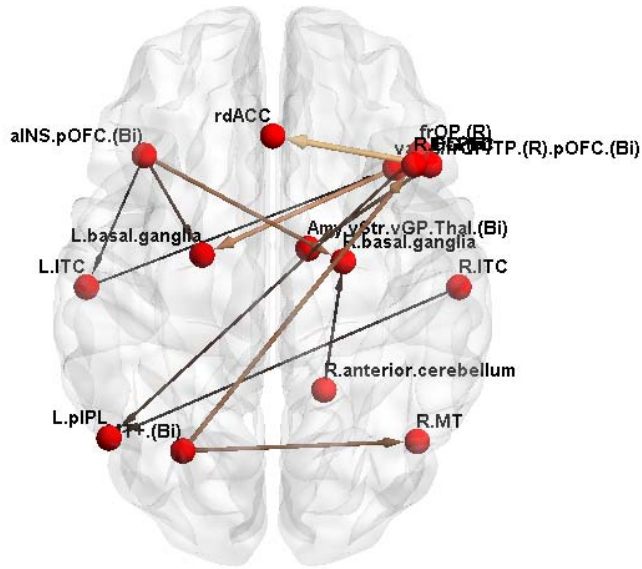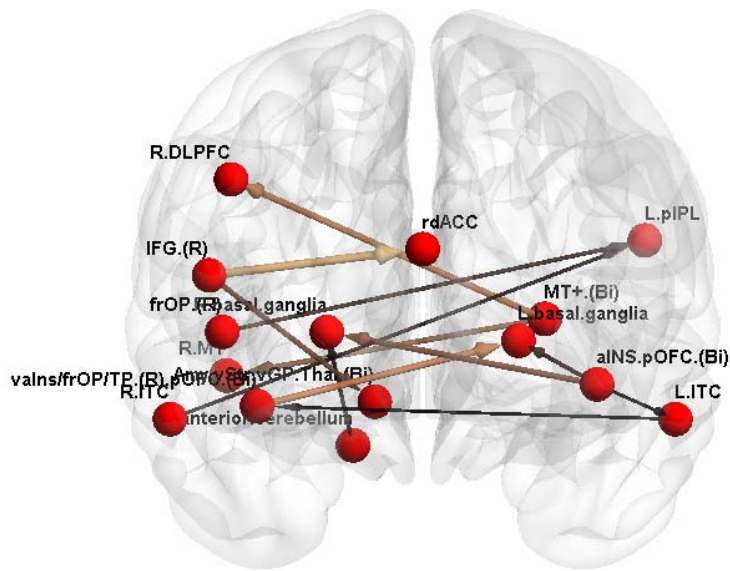

Figure 39 common path in comparisons of DPD&NC and DPD&MDD
